# Supplementary material for: The arbitrium system controls prophage induction
Source: PubMed Central journal article supplement (PMC8612738; doi:10.1016/j.cub.2021.08.072), 2021-11-22
Supplement: mmc1.pdf [file mmc1.pdf]

**Current Biology, Volume 31**

## **Supplemental Information**

### **The arbitrium system controls prophage induction**

**Aisling Brady, Nuria Quiles-Puchalt, Francisca Gallego del Sol, Sara Zamora-Caballero, Alonso Felipe-Ruíz, Jorge Val-Calvo, Wilfried J.J. Meijer, Alberto Marina, and José R. Penadés**

**A**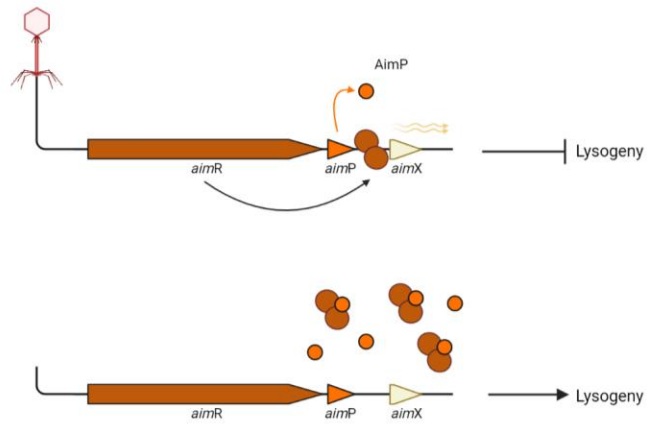**B**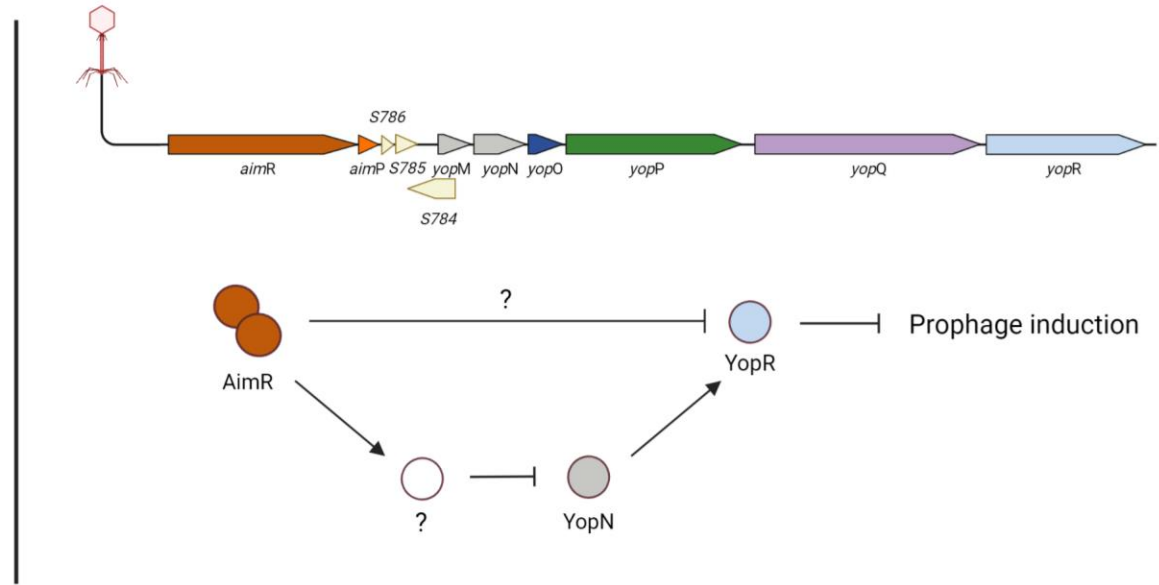

**Figure S1. Model for the mechanism of action of the arbitrium system in phages of the SP $\beta$  family, Related to Figure 3.** (A) The arbitrium model prior to this study describes that after infection of a SP $\beta$  prophage, AimR is being expressed and binds to the operator site promoting expression of the *aimX* sRNA and promoting the lytic cycle. After AimP accumulates above the threshold levels, it binds to AimR disrupting its binding to the DNA and reducing expression of *aimX*, leading to lysogeny. (B) Our understanding is that the arbitrium system of SP $\beta$  is involved in a more complex mechanism to control prophage induction. The regulator AimR functions to inhibit the phage repressor, YopR, thus promoting prophage induction. Another component of the system is YopN that we hypothesise to promote YopR activity, acting as a negative regulator of prophage induction. We propose that following activation of the SOS response, AimR activates an unknown component that blocks YopN function, thus reducing the activity of YopR and promoting induction.

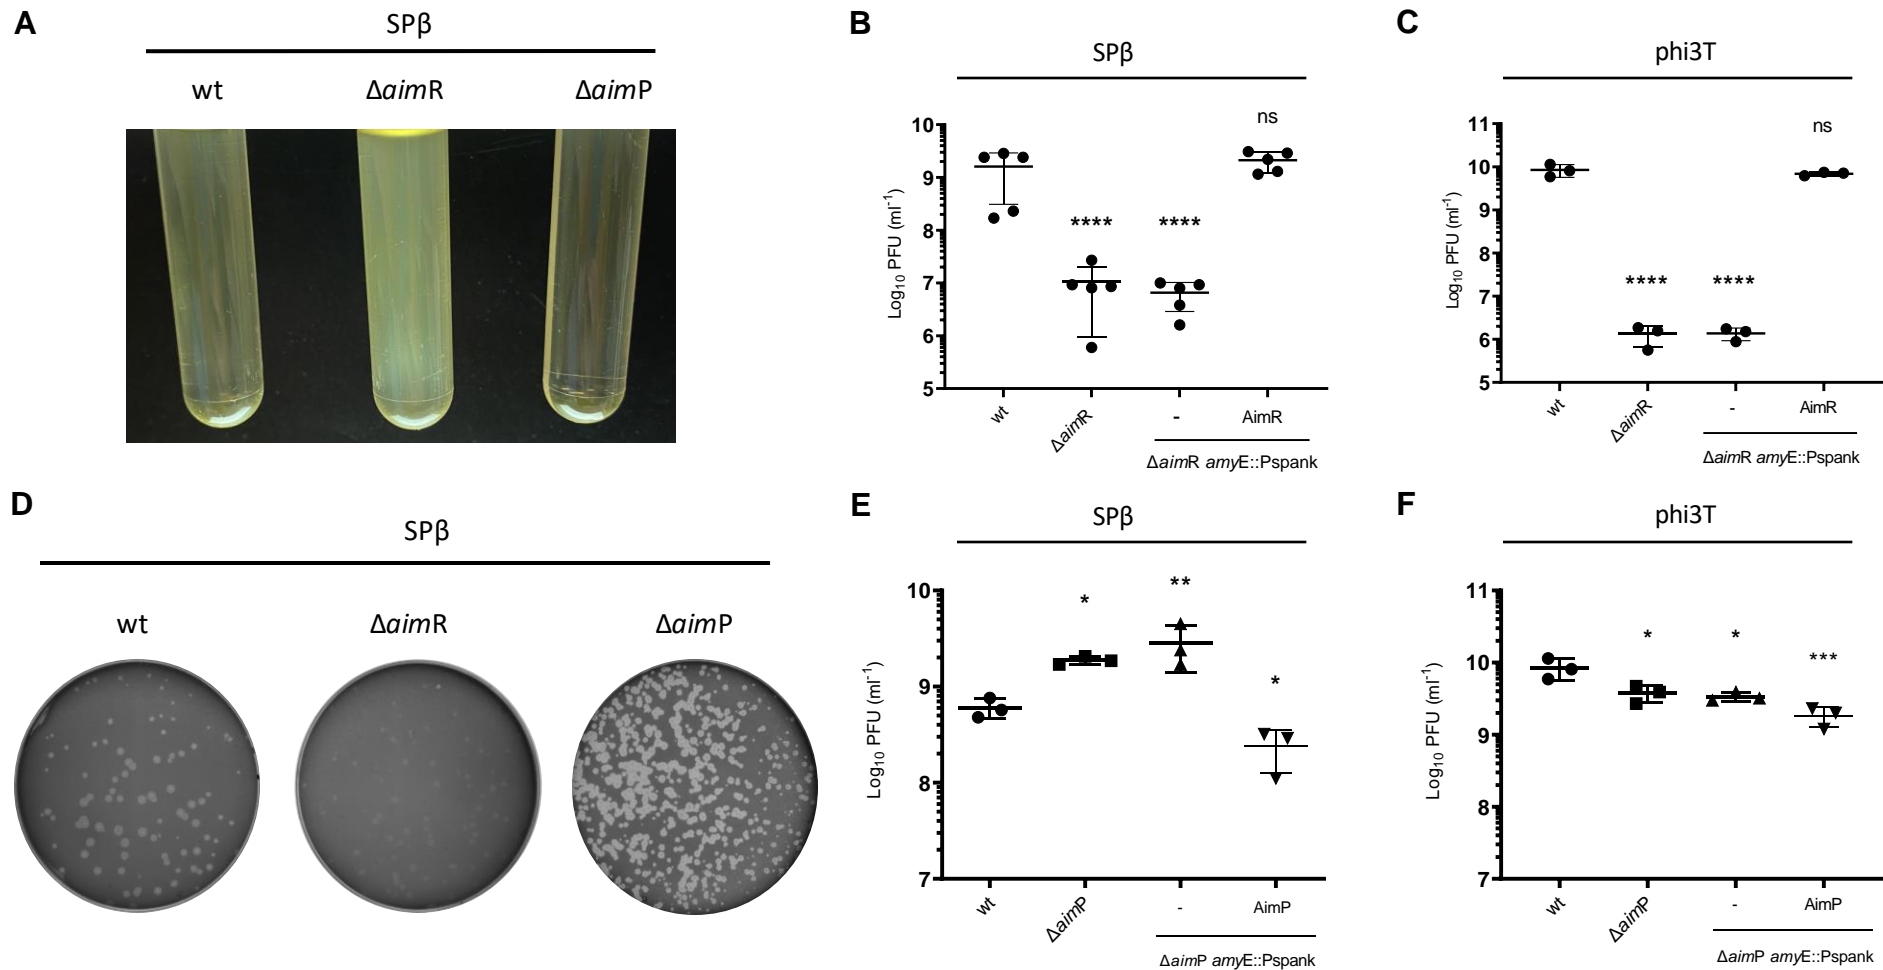

**Figure S2. Analysis of the *aimR* and *aimP* deletions in SP $\beta$ -type prophages, Related to Figure 5.** (A) Lysogenic strains for phage SP $\beta$ , SP $\beta$   $\Delta aimR$  or SP $\beta$   $\Delta aimP$  were MC induced (0.5  $\mu$ g/ml) and incubated at 30  $^{\circ}$ C with 80 rpm shaking for 4 h. The lysates were left overnight at room temperature before being photographed. (B) Complementation of the *aimR* mutant in SP $\beta$ . Strains lysogenic for phage SP $\beta$  wt,  $\Delta aimR$ ,  $\Delta aimR$  amyE::Pspank and  $\Delta aimR$  amyE::Pspank-AimR were MC induced (0.5  $\mu$ g/ml) and the number of resulting phages were quantified by titrating using 168  $\Delta 6$  as the recipient strain. The results are represented as the plaque forming units (PFUs) mL<sup>-1</sup>. The means and SDs are presented (n = 5). An ordinary one-way ANOVA of transformed data was performed to compare mean differences between titres. Adjusted p values were as follows: SP $\beta$   $\Delta aimR$  \*\*\*\*p = < 0.0001;  $\Delta aimR$  amyE::Pspank \*\*\*\*p = < 0.0001;  $\Delta aimR$  amyE::Pspank-AimR ns = not significant. (C) Complementation of the *aimR* mutant in phi3T. Strains lysogenic for phages phi3T wt,  $\Delta aimR$ ,  $\Delta aimR$  amyE::Pspank and  $\Delta aimR$  amyE::Pspank-AimR were MC induced (0.5  $\mu$ g/ml) and the number of resulting phages were quantified by titrating using 168  $\Delta 6$  as the recipient strain. The results are represented as PFUs/mL<sup>-1</sup>. The means and SDs are presented (n = 3). An ordinary one-way ANOVA of transformed data was performed to compare mean differences between titres. Adjusted p values were as follows: SP $\beta$   $\Delta aimR$  \*\*\*\*p = < 0.0001;  $\Delta aimR$  amyE::Pspank \*\*\*\*p = < 0.0001;  $\Delta aimR$  amyE::Pspank-AimR ns = not significant. (D) SP $\beta$  lysates were titered using 168  $\Delta 6$  as the recipient strain. The resulting plaque morphologies were photographed. (E) Strains lysogenic for phage SP $\beta$  wt,  $\Delta aimP$ ,  $\Delta aimP$  amyE::Pspank and  $\Delta aimP$  amyE::Pspank-AimP were MC induced (0.5  $\mu$ g/ml) and the number of resulting phages were quantified by titrating using 168  $\Delta 6$  as the recipient strain. The results are represented as the plaque forming units (PFUs) mL<sup>-1</sup>. The means and SDs are presented (n = 3). An ordinary one-way ANOVA of transformed data was performed to compare mean differences between titres. Adjusted p values were as follows: SP $\beta$   $\Delta aimP$  \*p = 0.0205;  $\Delta aimP$  amyE::Pspank \*\*p = 0.0049;  $\Delta aimP$  amyE::Pspank-AimP \*p = 0.0391. (F) Strains lysogenic for phages phi3T wt,  $\Delta aimP$ ,  $\Delta aimP$  amyE::Pspank and  $\Delta aimP$  amyE::Pspank-AimP were MC induced (0.5  $\mu$ g/ml) and the number of resulting phages were quantified by titrating using 168  $\Delta 6$  as the recipient strain. The results are represented as PFUs/mL<sup>-1</sup>. The means and SDs are presented (n = 3). An ordinary one-way ANOVA of transformed data was performed to compare mean differences between titres. Adjusted p values were as follows: phi3T  $\Delta aimP$  \*p = 0.0220;  $\Delta aimP$  amyE::Pspank \*p = 0.0125;  $\Delta aimP$  amyE::Pspank-AimP \*\*\*p = 0.0005.

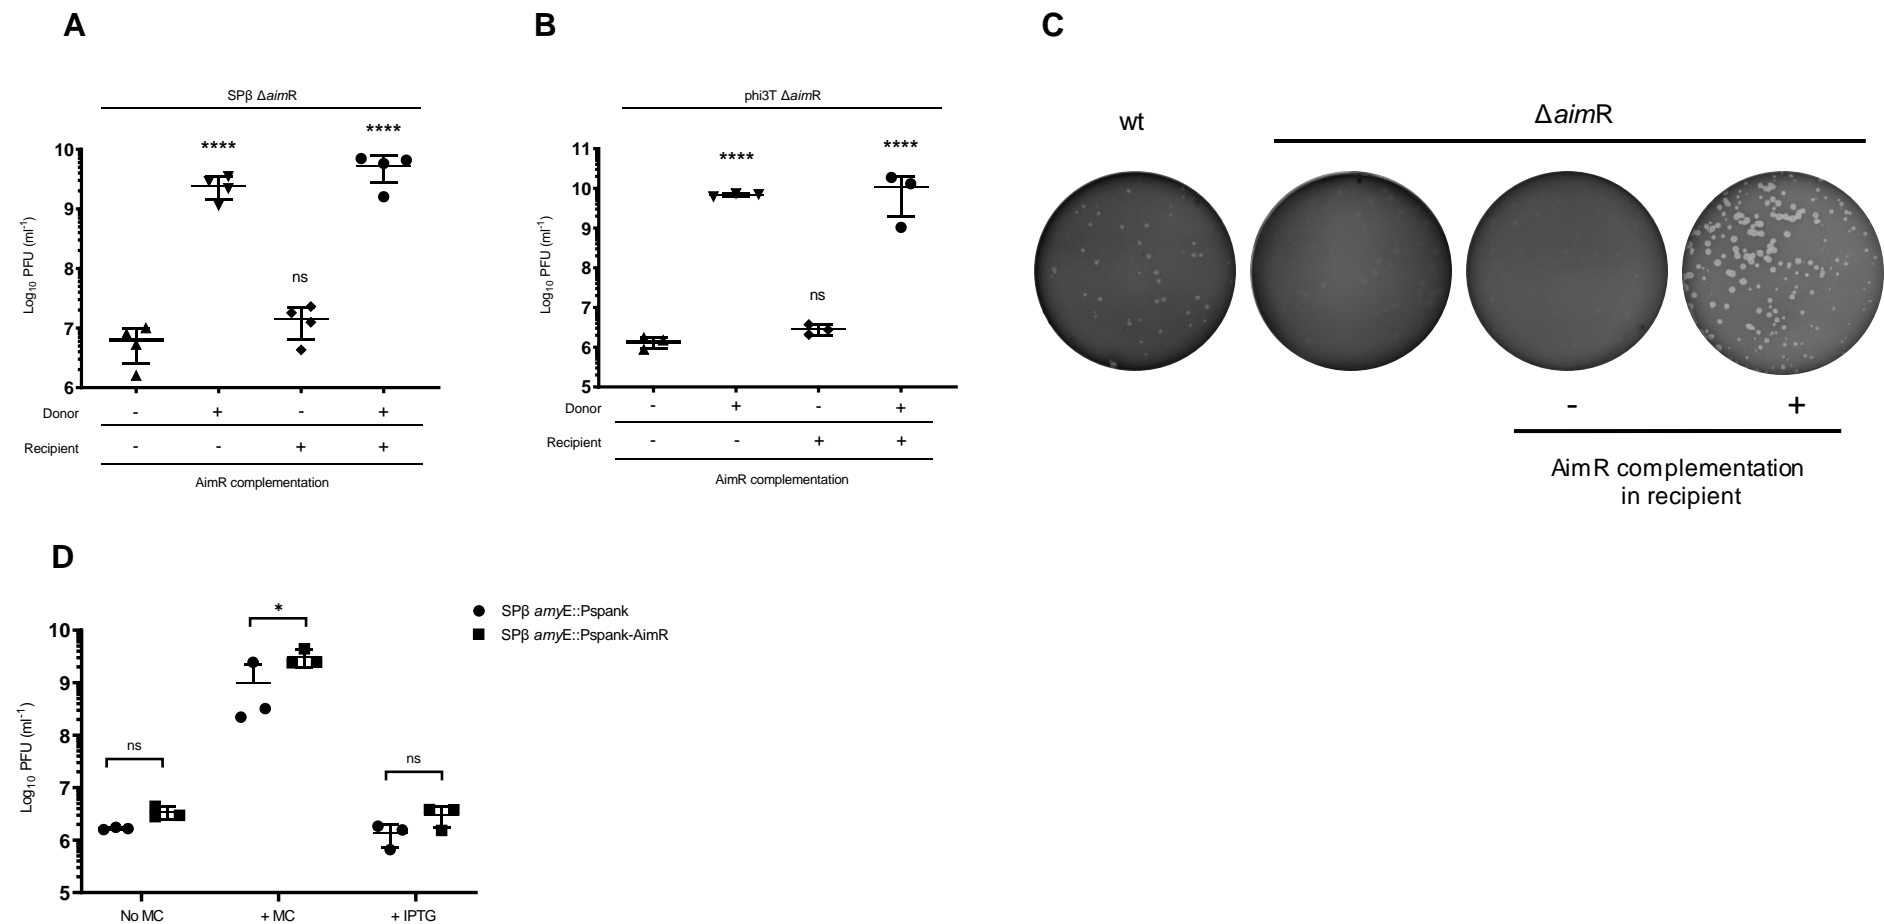

**Figure S3. Complementation of the *aimR* mutants in recipient strain, Related to Figure 4 and Figure 5.** (A) Strain lysogenic for phage SP $\beta$   $\Delta aimR$  was MC induced (0.5  $\mu\text{g/ml}$ ) and the number of resulting phages were quantified by titrating using 168  $\Delta 6$  *amyE*::Pspank (-) or 168  $\Delta 6$  *amyE*::Pspank-AimR<sub>SP $\beta$</sub>  (+) as recipient strains. The results are represented as the plaque forming units (PFUs)  $\text{mL}^{-1}$ . The means and SDs are presented ( $n = 4$ ). An ordinary one-way ANOVA of transformed data was performed to compare mean differences between titres. Adjusted p values were as follows: column A vs column B \*\*\*\* $p = <0.0001$ ; column A vs column C ns = not significant; column A vs column D \*\*\*\* $p = <0.0001$ . (B) Strain lysogenic for phage phi3T  $\Delta aimR$  was MC induced (0.5  $\mu\text{g/ml}$ ) and the number of resulting phages were quantified by titrating using 168  $\Delta 6$  *amyE*::Pspank (-) or 168  $\Delta 6$  and  $\Delta aimR$  *amyE*::Pspank-AimR<sub>phi3T</sub> (+) as recipient strains. The results are represented as the plaque forming units (PFUs)  $\text{mL}^{-1}$ . The means and SDs are presented ( $n = 3$ ). An ordinary one-way ANOVA of transformed data was performed to compare mean differences between titres. Adjusted p values were as follows: column A vs column B \*\*\*\* $p = <0.0001$ ; column A vs column C ns = not significant; column A vs column D \*\*\*\* $p = <0.0001$ . (C) Plaques morphologies produced after titration of the SP $\beta$   $\Delta aimR$  using 168  $\Delta 6$  *amyE*::Pspank (-) or 168  $\Delta 6$  *amyE*::Pspank-AimR<sub>SP $\beta$</sub>  (+) as recipient strains were photographed. (D) Overexpression of AimR does not induce the lytic cycle. Strains lysogenic for phage SP $\beta$  *amyE*::Pspank and SP $\beta$  *amyE*::Pspank-AimR<sub>SP $\beta$</sub>  were analysed for their ability to produce phage particles under several conditions: without induction (No MC), with phage induction (+ MC 0.5  $\mu\text{g/ml}$ ) and with Pspank induction (+ IPTG 1mM). The number of resulting phages were quantified by titrating using 168  $\Delta 6$  as the recipient strain. The results are represented as the plaque forming units (PFUs)  $\text{mL}^{-1}$ . The means and SDs are presented ( $n = 3$ ). An ordinary one-way ANOVA of transformed data was performed to compare mean differences between titres. Differences in titer with "No MC" and "+ IPTG" were not significant (ns). The adjusted p value comparing SP $\beta$  *amyE*::Pspank and *amyE*::Pspank-AimR + MC \* $p = 0.0227$ .

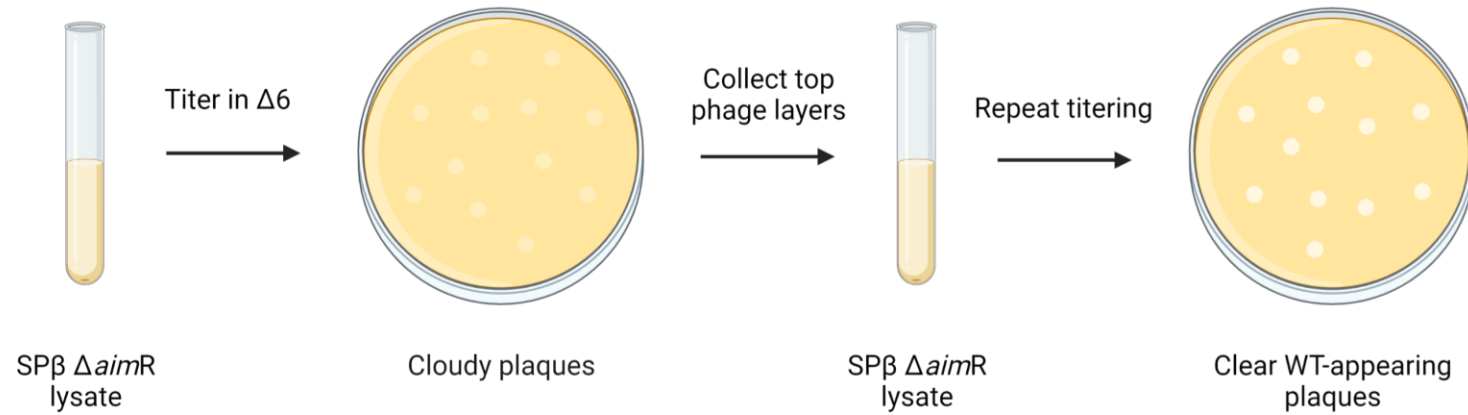

**Figure S4. Schematic representation of the *SPβ ΔaimR* evolution procedure Related to STAR Methods.** *SPβ ΔaimR* lysate was acquired following MC induction of a lysogenic strain carrying the *SPβ ΔaimR* phage. The lysate was titered using 168  $\Delta 6$  as the recipient strain and the resulting cloudy plaques were collected and passaged, as described in the STAR Methods, until wt-appearing plaques were obtained. Created with BioRender.com

SP $\beta$

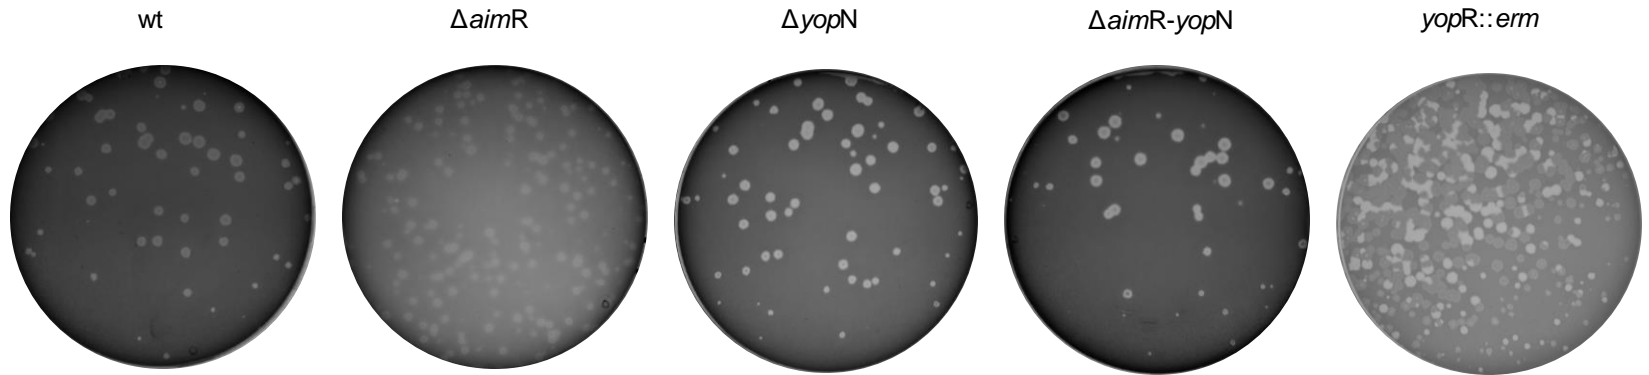

**Figure S5. Plaque morphology of SP $\beta$  wt,  $\Delta aimR$ ,  $\Delta yopN$ ,  $\Delta aimR-yopN$  and  $yopR::erm$  phages, Related to Figure 5 and Figure 6.** Strains lysogenic for phage SP $\beta$  wt,  $\Delta aimR$ ,  $\Delta yopN$  and  $\Delta aimR-yopN$  were MC induced (0.5  $\mu\text{g/ml}$ ) and titered using 168  $\Delta 6$  as the recipient strain. A strain lysogenic for phage SP $\beta$  was transformed with an erythromycin cassette to replace the  $yopR$  gene. The resulting strain, supposedly  $yopR::erm$ , was MC induced (0.5  $\mu\text{g/ml}$ ) and titered using 168  $\Delta 6$  as the recipient strain. The resulting plaque morphologies were photographed.

Unconserved 0 1 2 3 4 5 6 7 8 9 10 Conserved

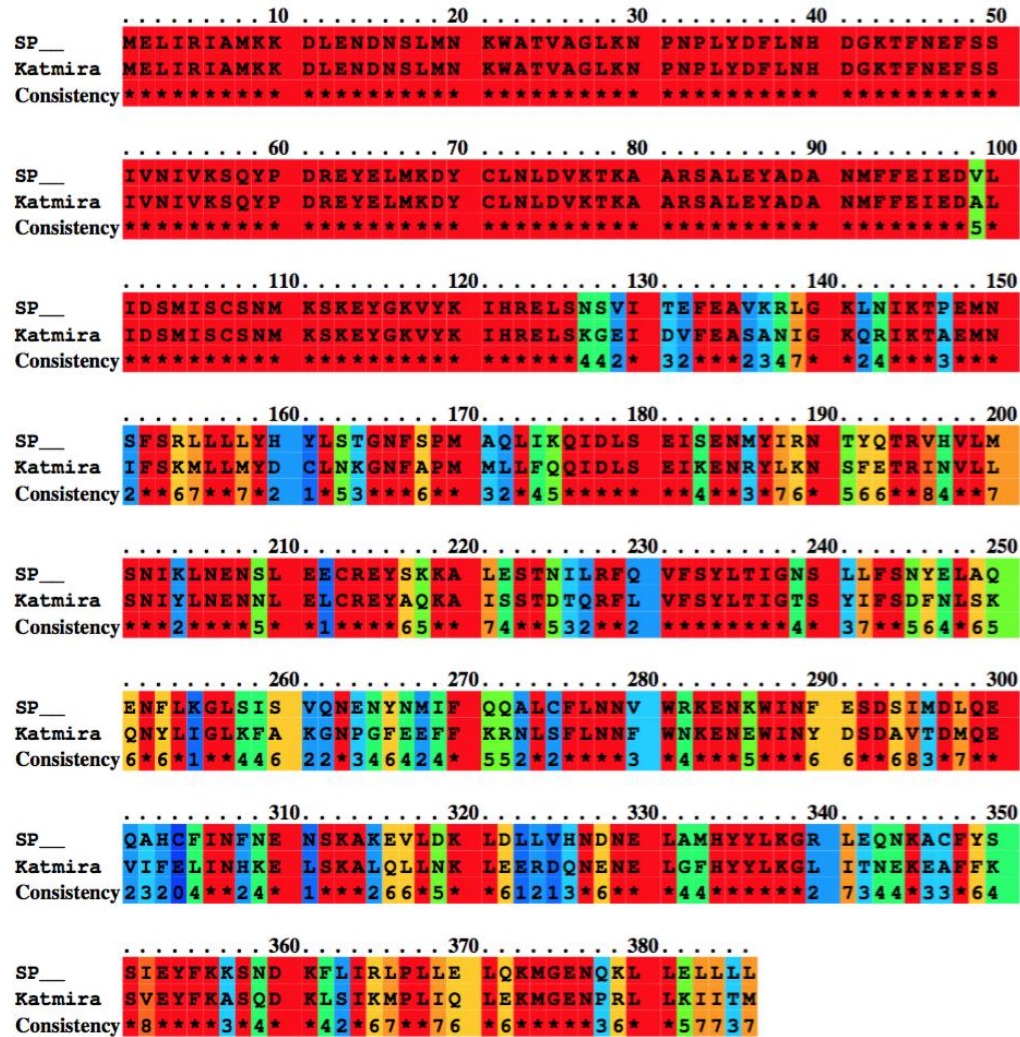

**Figure S6. Homology analysis of AimR<sub>Spp</sub> and AimR<sub>KATMIRA1933</sub>, Related to STAR Methods.** AimR sequences from SP $\beta$  and KATMIRA1933 were obtained from BLAST. The superposition analysis was made using the PRALINE program. Residues conservancy is depicted by blue to red colours.

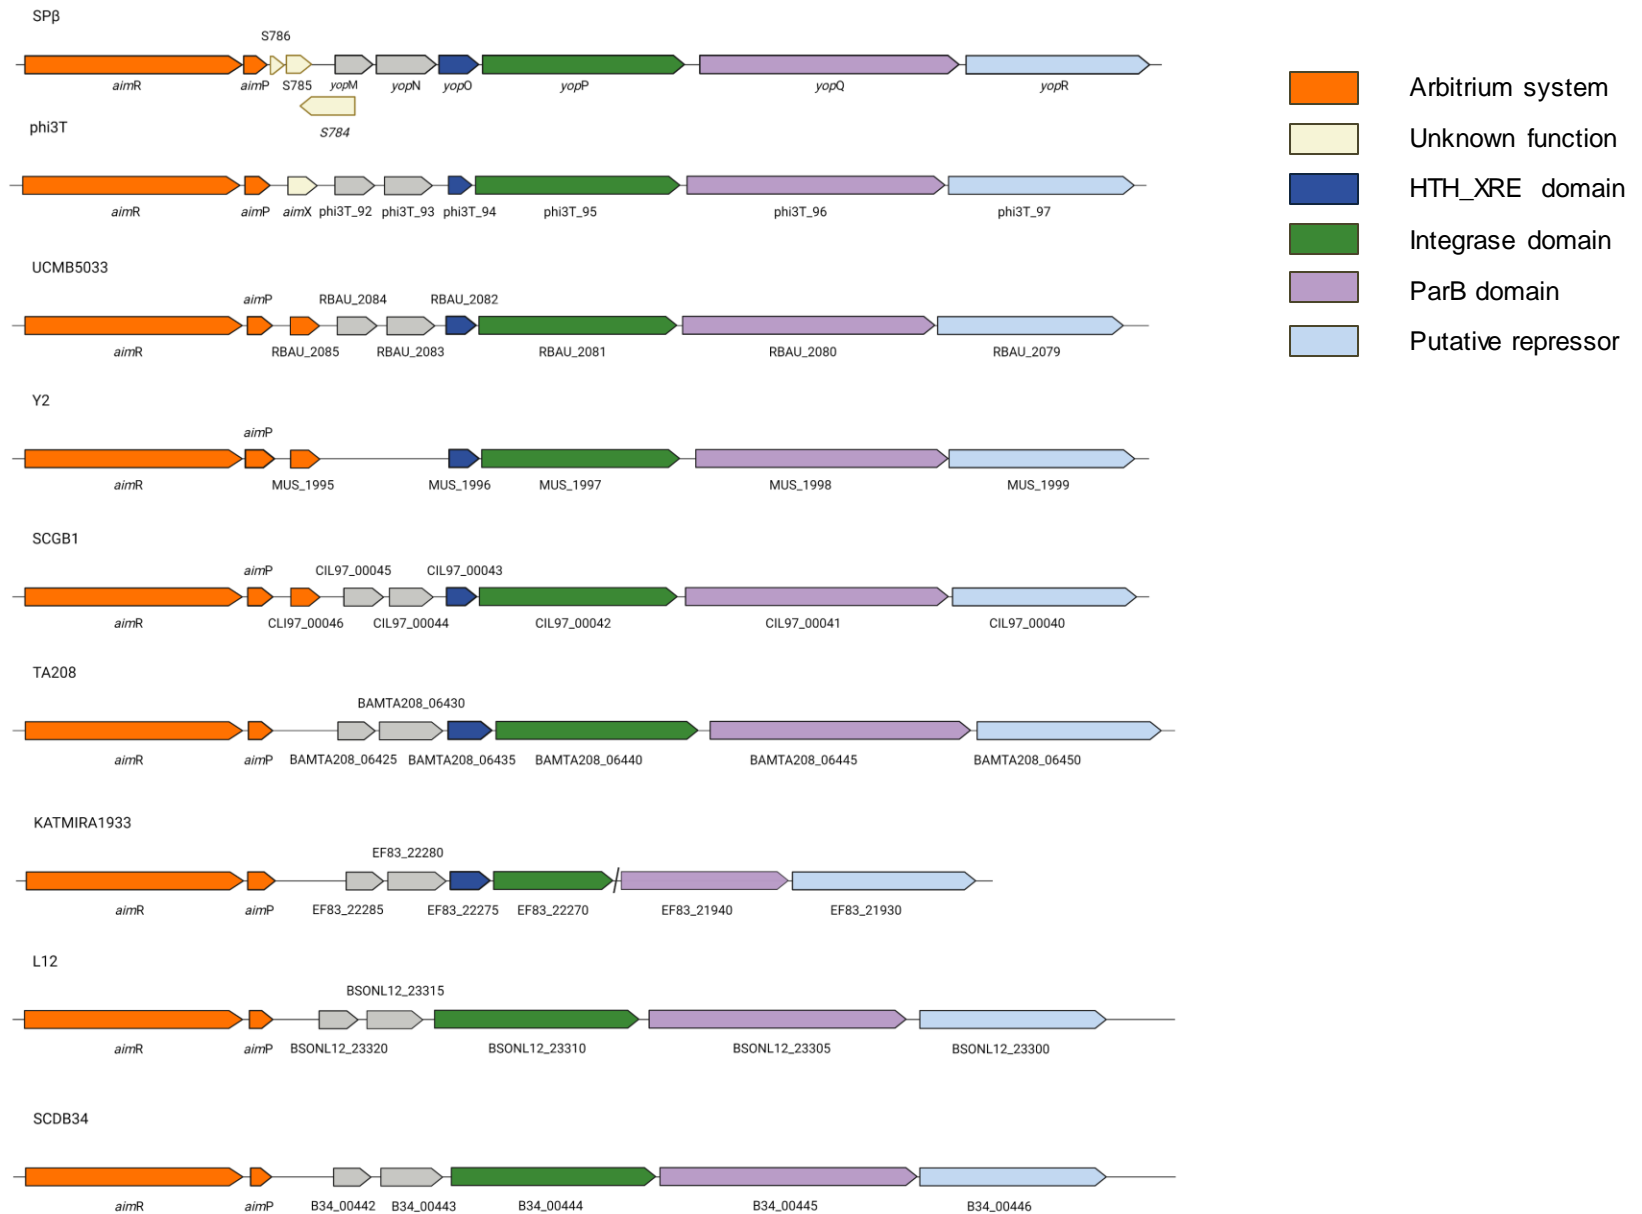

**Figure S7. Schematic representation of the SPβ-like phages arbitrium and operon genetic layout, Related to Figure 3.** Diagram shows the genetic organisation of the arbitrium genes, *aimR* and *aimP*, followed by the operon directly downstream. Colours denote putative functions according to BLAST results; orange: arbitrium genes, grey: unknown function, navy blue: HTH\_XRE domain, green: integrase domain, purple: ParB domain, light blue: putative repressor. Rotated black line indicates the end/beginning of the contigs containing the genes described for Katmira1933. Created with BioRender.com



| Strain        | Gene        | Mutation                                          |
|---------------|-------------|---------------------------------------------------|
| JP20762       | <i>yopN</i> | L90S                                              |
| JP20766       | <i>yopN</i> | L46P                                              |
|               | <i>yopQ</i> | T156T                                             |
| JP20769       | <i>yopN</i> | I51* Deletion produces frameshift and stop codon  |
| Lytic phage 1 | <i>yopR</i> | L140* Deletion produces frameshift and stop codon |
| Lytic phage 2 | <i>yopR</i> | L49* Deletion produces frameshift and stop codon  |

**Table S1. Mutations identified in evolved SP $\beta$   $\Delta aimR$  phages, Related to Figure 3 and Figure 4.**

| Phage/lysogen                                | AimR                     | AimP                     | AimP sequence | Operon genes accession numbers |                          |                          |                          |                          |                          |
|----------------------------------------------|--------------------------|--------------------------|---------------|--------------------------------|--------------------------|--------------------------|--------------------------|--------------------------|--------------------------|
|                                              |                          |                          |               | Gene 1                         | Gene 2                   | Gene 3                   | Gene 4                   | Gene 5                   | Gene 6                   |
| SP $\beta$                                   | GenBank:<br>NP_389968    | GenBank:<br>NP_389967    | GMPRGA        | GenBank:<br>NP_389966          | GenBank:<br>NP_389965    | GenBank:<br>NP_389964    | GenBank:<br>NP_389963    | GenBank:<br>NP_389962    | GenBank:<br>NP_389961    |
| phi3T                                        | GenBank:<br>APD21232     | GenBank:<br>APD21233     | SAIRGA        | GenBank:<br>APD21235           | GenBank:<br>APD21236     | GenBank:<br>APD21237     | GenBank:<br>APD21238     | GenBank:<br>APD21239     | GenBank:<br>APD21240     |
| <i>Bacillus amyloliquefaciens</i> UCMB5033   | GenBank:<br>CDG30054     | *NA                      | SPSRGA        | GenBank:<br>CDG30052           | GenBank:<br>CDG30051     | GenBank:<br>CDG30050     | GenBank:<br>CDG30049     | GenBank:<br>CDG30048     | GenBank:<br>CDG30047     |
| <i>Bacillus velezensis</i> strain SCGB 1     | GenBank:<br>ATC49385     | GenBank:<br>ATC49384     | SIIRGA        | GenBank:<br>ATC49382           | GenBank:<br>ATC49381     | GenBank:<br>ATC49380     | GenBank:<br>ATC49379     | GenBank:<br>ATC49378     | GenBank:<br>ATC49377     |
| <i>Bacillus amyloliquefaciens</i> TA208      | GenBank:<br>AEB23458     | GenBank:<br>AEB23459     | GVVRGA        | GenBank:<br>AEB23460           | GenBank:<br>AEB23461     | GenBank:<br>AEB23462     | GenBank:<br>AEB23463     | GenBank:<br>AEB23464     | GenBank:<br>AEB23465     |
| <i>Bacillus atrophaeus</i> BA59              | GenBank:<br>ATO28982     | GenBank:<br>ATO28981     | GMPRGA        | GenBank:<br>ATO28980           | *NA                      | GenBank:<br>ATO28979     | *NA                      | GenBank:<br>ATO28978     | GenBank:<br>ATO28977     |
| <i>Bacillus subtilis</i> KATMIRA1933         | GenBank:<br>WP_033885437 | GenBank:<br>WP_134819006 | GIVRGA        | GenBank:<br>WP_033885435       | GenBank:<br>WP_009967507 | GenBank:<br>WP_019712296 | GenBank:<br>WP_033885434 | GenBank:<br>NP_389962.1  | GenBank:<br>WP_003231032 |
| <i>Bacillus sonorensis</i> L12               | GenBank:<br>WP_051056713 | GenBank:<br>WP_141231111 | GFPRGA        | GenBank:<br>WP_006640569       | GenBank:<br>WP_006640568 | *NA                      | GenBank:<br>WP_006640567 | GenBank:<br>WP_006640566 | GenBank:<br>WP_006640565 |
| <i>Bacillus licheniformis</i> strain SCDB 34 | GenBank:<br>ARC67883     | GenBank:<br>ARC67884     | GFTVGA        | GenBank:<br>ARC67885           | GenBank:<br>ARC67886     | *NA                      | GenBank:<br>ARC67887     | GenBank:<br>ARC67888     | GenBank:<br>ARC67889     |

\*NA: Not annotated

**Table S2. Genetic composition of the arbitrium-operon region in the different SP $\beta$ -like phage families, Related to Figure 3.**

| Strains                  | Genotype or description                                                                                                            | Reference or source |
|--------------------------|------------------------------------------------------------------------------------------------------------------------------------|---------------------|
| <i>Bacillus subtilis</i> |                                                                                                                                    |                     |
| 168 (1A700)              | <i>trpC2</i>                                                                                                                       | S1                  |
| Δ6 (1A1299)              | <i>trpC2</i> ; ΔSPβ ; subclacin 168-sensitive; Δ <i>skin</i> ; ΔPBSX; Δprophage 1; Δ <i>pks</i> ::Cm; Δprophage 3; Cm <sup>r</sup> | S2                  |
| IL26                     | <i>phi3T</i>                                                                                                                       | S3                  |
| BKK20860                 | <i>trpC2</i> Δ <i>aimR</i> :: <i>kan</i>                                                                                           | S4                  |
| BKE20860                 | <i>trpC2</i> Δ <i>aimR</i> :: <i>erm</i>                                                                                           | S4                  |
| BKE20850                 | <i>trpC2</i> Δ <i>aimP</i> :: <i>erm</i>                                                                                           | S4                  |
| BKE20830                 | <i>trpC2</i> Δ <i>yopN</i> :: <i>erm</i>                                                                                           | S4                  |
| BKE20790                 | <i>trpC2</i> Δ <i>yopR</i> :: <i>erm</i>                                                                                           | S4                  |
| JP22770                  | <i>trpC2</i> SPβ Δ <i>aimR</i>                                                                                                     | This study          |
| JP22771                  | <i>trpC2</i> SPβ Δ <i>aimP</i>                                                                                                     | This study          |
| JP22776                  | <i>trpC2</i> SPβ Δ <i>aimR</i> ; <i>amyE</i> ::P <sub>spank</sub>                                                                  | This study          |
| JP22777                  | <i>trpC2</i> SPβ Δ <i>aimR</i> ; <i>amyE</i> ::P <sub>spank</sub> <i>aimR</i> <sub>SPβ</sub>                                       | This study          |
| JP19877                  | Δ6 lysogenic SPβ                                                                                                                   | This study          |
| JP19936                  | Δ6 lysogenic SPβ Δ <i>aimR</i>                                                                                                     | This study          |
| JP20866                  | Δ6 lysogenic SPβ <i>yokl</i> :: <i>kan</i>                                                                                         | This study          |
| JP22949                  | Δ6 lysogenic SPβ <i>yokl</i> :: <i>kan</i> Δ <i>aimR</i>                                                                           | This study          |
| JP21702                  | Δ6 lysogenic SPβ <i>yokl</i> :: <i>kan</i> Δ <i>aimP</i>                                                                           | This study          |
| JP22950                  | Δ6 lysogenic SPβ <i>yokl</i> :: <i>kan</i> Δ <i>aimR</i> ; <i>amyE</i> ::P <sub>spank</sub>                                        | This study          |
| JP22951                  | Δ6 lysogenic SPβ <i>yokl</i> :: <i>kan</i> Δ <i>aimR</i> ; <i>amyE</i> ::P <sub>spank</sub> <i>aimR</i> <sub>SPβ</sub>             | This study          |
| JP21854                  | Δ6 lysogenic <i>phi3T</i>                                                                                                          | This study          |
| JP21870                  | Δ6 lysogenic <i>phi3T</i> <i>phi3T_5</i> :: <i>kan</i>                                                                             | This study          |
| JP22453                  | Δ6 lysogenic <i>phi3T</i> <i>phi3T_5</i> :: <i>kan</i> Δ <i>aimR</i>                                                               | This study          |
| JP22454                  | Δ6 lysogenic <i>phi3T</i> <i>phi3T_5</i> :: <i>kan</i> Δ <i>aimP</i>                                                               | This study          |
| JP22518                  | Δ6 lysogenic <i>phi3T</i> <i>phi3T_5</i> :: <i>kan</i> Δ <i>aimR</i> ; <i>amyE</i> ::P <sub>spank</sub>                            | This study          |
| JP22519                  | Δ6 lysogenic <i>phi3T</i> <i>phi3T_5</i> :: <i>kan</i> Δ <i>aimR</i> ; <i>amyE</i> ::P <sub>spank</sub> <i>aimR</i> <sub>SPβ</sub> | This study          |
| JP20762                  | Δ6 lysogenic SPβ Δ <i>aimR</i> ; <i>yopN</i> L90S                                                                                  | This study          |
| JP20766                  | Δ6 lysogenic SPβ <i>yokl</i> :: <i>kan</i> Δ <i>aimR</i> ; <i>yopN</i> L46P; <i>yopQ</i> T156T                                     | This study          |
| JP20769                  | Δ6 lysogenic SPβ <i>yokl</i> :: <i>kan</i> Δ <i>aimR</i> ; <i>yopN</i> A49*                                                        | This study          |
| JP22952                  | Δ6 lysogenic SPβ Δ <i>yopN</i>                                                                                                     | This study          |
| JP22953                  | Δ6 lysogenic SPβ Δ <i>aimR</i> Δ <i>yopN</i>                                                                                       | This study          |
| JP21752                  | Δ6 lysogenic SPβ <i>yopR</i> :: <i>erm</i>                                                                                         | This study          |
| JP22339                  | Δ6 lysogenic SPβ <i>yopR</i> :: <i>erm</i> ; <i>amyE</i> ::P <sub>spank</sub> <i>yopR</i> <sub>SPβ</sub>                           | This study          |
| JP19679                  | Δ6 <i>amyE</i> ::P <sub>spank</sub>                                                                                                | This study          |
| JP19944                  | Δ6 <i>amyE</i> ::P <sub>spank</sub> <i>aimR</i> <sub>SPβ</sub>                                                                     | This study          |
| JP22515                  | Δ6 <i>amyE</i> ::P <sub>spank</sub> <i>aimR</i> <sub>3T</sub>                                                                      | This study          |
| JP21941                  | Δ6 <i>amyE</i> ::P <sub>spank</sub> <i>yopR</i> <sub>SPβ</sub>                                                                     | This study          |
| JP19883                  | Δ6 lysogenic SPβ; <i>amyE</i> ::P <sub>spank</sub>                                                                                 | This study          |

**Table S3. Bacterial strains, Related to STAR Methods.**

| Plasmid | Description                                                                                                                             | Reference or source |
|---------|-----------------------------------------------------------------------------------------------------------------------------------------|---------------------|
| pDR244  | <i>B. subtilis</i> thermosensitive vector containing Cre recombinase that allows excision of DNA fragments flanked by <i>loxP</i> sites | S4                  |
| pDR110  | <i>B. subtilis amyE</i> integration vector containing IPTG-inducible $P_{spank}$ promoter                                               | S5                  |
| pJP2340 | <i>aimR<sub>SPβ</sub></i> gene cloned in integration vector pDR110                                                                      | This study          |
| pJP2801 | <i>aimR<sub>3T</sub></i> gene cloned in integration vector pDR111                                                                       | This study          |
| pJP2800 | <i>yopR<sub>SPβ</sub></i> gene cloned in integration vector pDR110                                                                      | This study          |

**Table S4. Plasmids used in this study, Related to STAR Methods.**

| Mutants                               | Oligonucleotides        | Sequence (5'-3')                                                                                       |                                                                           |
|---------------------------------------|-------------------------|--------------------------------------------------------------------------------------------------------|---------------------------------------------------------------------------|
| <i>kan</i> marker without <i>loxP</i> | KanR-5m                 | TTTGATTTTTAATGGATAATGTGATAAATC                                                                         |                                                                           |
|                                       | KanR-6c                 | TCTAGGTAATAAAACAATTCATCC                                                                               |                                                                           |
| <i>erm</i> marker with <i>loxP</i>    | ErmR-1m                 | AGGCGAGAAAGGAGAGAGAACGCAAGGAGAGGCACGCGAGGGAGGAAAAGGC<br>AGGATACCGTTTCGTATAGCATAACATTATACGAAGTTATGAATTC |                                                                           |
|                                       | ErmR-2c                 | AGGCTCCTGTCACTGCTTCGCTCTGCTTCGGTGTGCTCGCCGTATCTGTGCTC<br>TCTCTACCGTTTCGTATAATGTATGCTATACGAAGTTATCTCGAG |                                                                           |
| SPβ <i>yokI::kan</i>                  | Forward Flanking        | yokI-5pL                                                                                               | ATCCTCCATTGCTTTAGTCAGTATG                                                 |
|                                       |                         | yokI-1_R                                                                                               | GATTATATCACATTATCCATTAATAAATCAAACCATTTTATTCTCCTTTCAAGCC                   |
|                                       | Reverse Flanking        | yokI-4_F                                                                                               | GGATGAATTGTTTTAGTACCTAGAAACTTTAGAAAGTAGGTGCG                              |
|                                       |                         | yokI-3pR                                                                                               | ACTGAAGACAACTCCTCAAACG                                                    |
| phi3T <i>yokI::kan</i>                | Forward Flanking        | phi3T-1m                                                                                               | GCAATGTTTCTGAACAGATTGCG                                                   |
|                                       |                         | phi3T-2c                                                                                               | GATTATATCACATTATCCATTAATAAATCAAATCATTCTCCTTCCATTCTTACTC                   |
|                                       | Reverse Flanking        | phi3T-3m                                                                                               | GGATGAATTGTTTTAGTACCTAGACACAGGCCGAAGCTGAAGATTGG                           |
|                                       |                         | phi3T-4c                                                                                               | CTTGCCTACAACCTCCGCTTC                                                     |
| SPβ <i>aimR::erm</i>                  | AimR-SPB-24mB           | CGCGGATCCATACAATGGCGCTGAGATCC                                                                          |                                                                           |
|                                       | AimR-SPB-14cS           | ACGCGTCCGACCACAAAATGTATTAGGGATCTAAAATGCGG                                                              |                                                                           |
| SPβ <i>aimP::erm</i>                  | AimP-SPB-1mB            | CGCGGATCCGACAAAGGCAGCAAGAAGTGC                                                                         |                                                                           |
|                                       | AimP-SPB-4c             | ATTGTGATGCCACGTTTGACC                                                                                  |                                                                           |
| SPβ <i>yopN::erm</i>                  | Spbeta_5_S_F            | CTGCAGGTCGACACCTGAAATGAATCTTTCTCAAG                                                                    |                                                                           |
|                                       | YopMNO_R                | GCCTTTCACCTCATGTGATGTTGC                                                                               |                                                                           |
| SPβ <i>yopR::erm</i>                  | YopR_F                  | CTTCACAGAAACGGATATGAGAG                                                                                |                                                                           |
|                                       | YopR_R                  | CTCTCCCTTGAACAAAAGTAGG                                                                                 |                                                                           |
| phi3T <i>aimR::erm</i>                | Forward Flanking        | AimR-phi3T-1m                                                                                          | CGAATCGTGGAGAACTTTGCAATG                                                  |
|                                       |                         | AimR-phi3T-2c                                                                                          | GTTCTCTCTCCTTTCTCGCCTGCCTGCTTTAATTTCAATTGTCTCC                            |
|                                       | Reverse Flanking        | AimR-phi3T-3m                                                                                          | GCGAAGCAGTGACAGGACCTCGGTTTGACAAAATTTGAAAGGAGGTG                           |
|                                       |                         | AimR-phi3T-4c                                                                                          | CAAGACAATCATATGCTTTTTCCAG                                                 |
| phi3T <i>aimP::erm</i>                | Forward Flanking        | AimR-phi3T-5m                                                                                          | GTTGCATTGGCCAATTATGC                                                      |
|                                       |                         | AimR-phi3T-11c                                                                                         | GCCAATAGTTAAGTAGCTGAAAACCTGAAACGCCAGGATATTTGACTTTCCAA<br>TGCC             |
|                                       | Reverse Flanking        | AimR-phi3T-11m                                                                                         | GGCTTTGTGCTTTTAAATAATGTATGGCGCCGCCCAAGTGGATTAATTT<br>TGAATCTGATTCAATTATGG |
|                                       |                         | AimR-phi3T-4c                                                                                          | CAAGACAATCATATGCTTTTTCCAG                                                 |
| <b>Plasmids</b>                       | <b>Oligonucleotides</b> | <b>Sequence (5'-3')</b>                                                                                |                                                                           |
| pJP2340                               | AimR-SPBeta-1mH         | CCCAAGCTTGAAGTATGATCTATAG                                                                              |                                                                           |
|                                       | AimR-SPBeta-2cS         | ACGCGTCCGACCATTGTCTCACCTCCTTTAAAGTAAAAG                                                                |                                                                           |
| pJP2750                               | AimR-phi3T-9mS          | ACGCGTCCGACCTTGAATTTCTGACAACCTATGAGG                                                                   |                                                                           |
|                                       | AimR-phi3T-10cSphI      | ACATGCATGCCCTCCTTTCAAATTTGTCAAACC                                                                      |                                                                           |
| pJP2800                               | YopR_2F                 | ACGCGTCCGACAGGTGTAGTAGACAAGAATGG                                                                       |                                                                           |
|                                       | YopR_2R                 | ACATGCATGCCCATTTAACCAAAATAGTCAAATGGATTTTC                                                              |                                                                           |
| <b>Southern Blot</b>                  | <b>Oligonucleotides</b> | <b>Sequence (5'-3')</b>                                                                                |                                                                           |
| SPβ probe                             | SPBeta-1m               | GATAGGCTTACCGAGGTCTTC                                                                                  |                                                                           |
|                                       | SPBeta-2c               | CTAATGGACGGCTGGAGAGGC                                                                                  |                                                                           |

**Table S5. Primers used in this study, Related to STAR Methods.**

### Supplemental References:

- S1. Burkholder, P. R., and N. H. Giles. (1947). Induced biochemical mutations in *Bacillus subtilis*. Amer. J. Bot. 34:345.
- S2. Westers H, Dorenbos R, van Dijk JM, Kabel J, Flanagan T, Devine KM, et al. (2003). Genome engineering reveals large dispensable regions in *Bacillus subtilis*. Mol Biol Evol. 20, 2076–90.
- S3. Dean, D. H., J. C. Orrego, K. W. Hutchinson, and H. O. Halvorson. (1976). New temperate bacteriophage for *Bacillus subtilis*, r11. J. Virol. 20, 509-519.
- S4. Koo BM, Kritikos G, Farelli JD, Todor H, Tong K, Kimsey H, Wapinski I, Galardini M, Cabal A, Peters JM et al. (2017). Construction and Analysis of Two Genome-Scale Deletion Libraries for *Bacillus subtilis*. Cell Syst. 4, 291-305.
- S5. Carniol K, Ben-Yehuda S, King N, Losick R. (2005). Genetic dissection of the sporulation protein SpoIIIE and its role in asymmetric division in *Bacillus subtilis*. J Bacteriol. 187, 3511–20.
